# Supplementary material for: N-doped ordered mesoporous carbon as a high performance anode material in sodium ion batteries at room temperature
Source: Royal Society of Chemistry journal article supplement (doi:10.1039/c4ra09084e), 2014-01-01
Supplement: c4ra09084e1.pdf [file c4ra09084e1.pdf]

## Electronic Supplementary Information

# **N-doped ordered mesoporous carbon as high performance anode materials in sodium ion batteries at room temperature**

Zhiguang Wang<sup>a</sup>, Yueming Li<sup>\*a</sup>, and Xiao-Jun Lv<sup>\*b</sup>

---

<sup>a</sup> State Key Laboratory of Metastable Materials Science and Technology, College of Materials Science and Engineering, Yanshan University, Qinhuangdao, Hebei Province, 066004, China, E-mail: liyueming@ysu.edu.cn

<sup>b</sup> Key Laboratory of Photochemical Conversion and Optoelectronic Materials and HKU-CAS Joint Laboratory on New Materials, Technical Institute of Physics and Chemistry, Chinese Academy of Sciences, Beijing 100190, China, E-mail: xjlv@mail.ipc.ac.cn

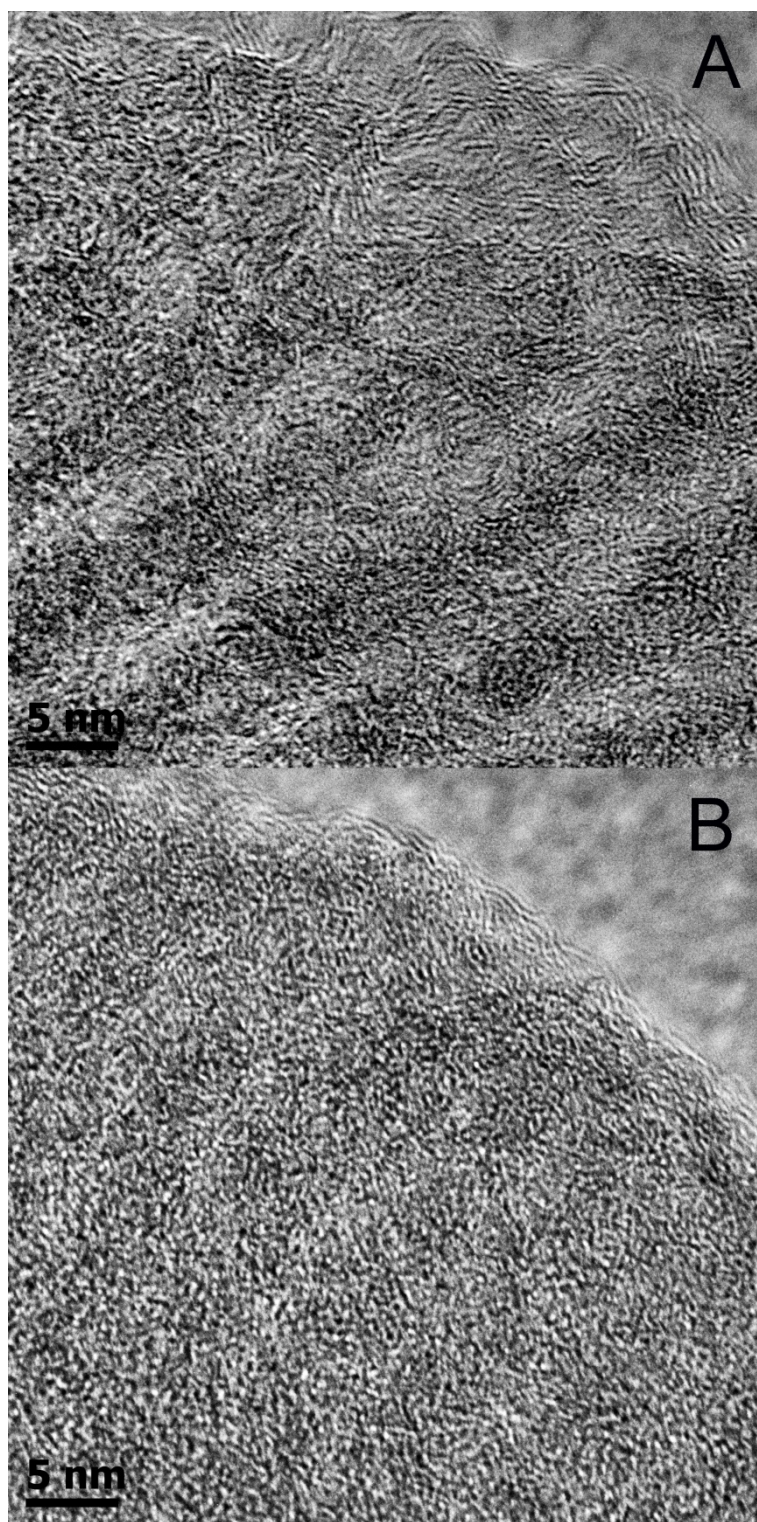

**Fig. S1** High resolution TEM images of CMK-3 (A) and NCMK (B)
